# Supplementary material for: Ventricular Arrhythmias in Young Competitive Athletes: Prevalence, Determinants, and Underlying Substrate
Source: PubMed Central journal article supplement — J Am Heart Assoc. 2018 Jun 9;7(12):e009171. doi: 10.1161/JAHA.118.009171 (PMC6220536; doi:10.1161/jaha.118.009171), 2018-06-09
Supplement: JAH3-7-e009171-s001.pdf [file JAH3-7-e009171-s001.pdf]

# **SUPPLEMENTAL MATERIAL**

**Table S1. Prevalence of athletes and sedentary controls showing >10 isolated premature ventricular beats or ≥1 complex ventricular arrhythmias according to sex and age class.**

|                   |                     | <b>Athletes</b> | <b>Sedentary control</b> |
|-------------------|---------------------|-----------------|--------------------------|
| <b>Female sex</b> | <b>≤25 y.o.</b>     | 2/62 (3%)       | 2/31 (6%)                |
|                   | <b>&gt; 25 y.o.</b> | 5/24 (21%)      | 2/12 (17%)               |
| <b>Male sex</b>   | <b>≤ 25 y.o.</b>    | 9/134 (7%)      | 5/67 (7%)                |
|                   | <b>&gt; 25 y.o.</b> | 12/68 (17%)     | 7/34 (21%)               |

**Table S2. Comparison between the burden of ventricular arrhythmias at 24-hours 12-leads ambulatory ECG monitoring in athletes and controls with and without a history of palpitations.**

|                               | <b>Athletes</b>                          |                                               | <b>Sedentary controls</b>                 |                                               |
|-------------------------------|------------------------------------------|-----------------------------------------------|-------------------------------------------|-----------------------------------------------|
|                               | <b>History of palpitations<br/>(N=7)</b> | <b>No history of palpitations<br/>(N=281)</b> | <b>History of palpitations<br/>(N=12)</b> | <b>No history of palpitations<br/>(N=132)</b> |
| <b>No PVBs</b>                | 3 (43%)                                  | 115 (41%)                                     | 9 (75%)                                   | 79 (60%)                                      |
| <b>1-10 isolated PVBs</b>     | 3 (43%)                                  | 139 (49%)                                     | 3 (25%)                                   | 38 (29%)                                      |
| <b>11-100 isolated PVBs</b>   | 0                                        | 2 (1%)                                        | 0                                         | 3 (2%)                                        |
| <b>&gt; 100 isolated PVBs</b> | 0                                        | 10 (4%)                                       | 0                                         | 5 (4%)                                        |
| <b>≥1 couplet or triplet</b>  | 1 (14%)                                  | 9 (3%)                                        | 0                                         | 5 (4%)                                        |
| <b>≥1 run (≥4 beats)</b>      | 0                                        | 6 (2%)                                        | 0                                         | 3 (2%)                                        |
| <b><i>P</i> value</b>         | 0.65                                     |                                               | 0.84                                      |                                               |

**Table S3. Ventricular arrhythmias grading and prevalent morphology in the subgroup of 28 athletes with >10 isolated PVBs/hour or ≥1 complex VA according to sex.**

|                                        | <b>Females</b><br>N=7 | <b>Males</b><br>N=21 | <b>p</b> |
|----------------------------------------|-----------------------|----------------------|----------|
| <b>VA grading</b>                      |                       |                      |          |
| 11-100 isolated PVBs                   | 1 (14%)               | 1 (5%)               | 0.26     |
| > isolated PVBs                        | 2 (29%)               | 8 (38%)              |          |
| Couplets or triplets                   | 1 (14%)               | 9 (43%)              |          |
| Non-sustained VT                       | 3 (43%)               | 3 (14%)              |          |
| <b>VA morphology</b>                   |                       |                      |          |
| Outflow tract                          | 3 (43%)               | 8 (38%)              | 0.48     |
| Fascicular                             | 1 (14%)               | 3 (14%)              |          |
| LBBB and intermediate or superior axis | 2 (29%)               | 4 (19%)              |          |
| RBBB QRS duration >130 ms.             | 1 (14%)               | 4 (19%)              |          |
| Polymorphic                            | 0                     | 2 (10%)              |          |

PVBs=premature ventricular beats; LBBB=left bundle branch block; RBBB=right bundle branch block; VA=ventricular arrhythmias

**Table S4. Summary of previous studies comparing the burden of ventricular arrhythmias in athletes and sedentary controls.**

| Reference                                            | N. athletes/ controls | Type of athletes                         | Prevalence of arrhythmias                                                                                                                     | Imaging for underlying heart disease |
|------------------------------------------------------|-----------------------|------------------------------------------|-----------------------------------------------------------------------------------------------------------------------------------------------|--------------------------------------|
| <b>Viitasalo, Br Heart J 1982<sup>1</sup></b>        | 35/35                 | Young endurance (23±6 y.o.)              | 29% athletes versus 31% controls had rare isolated PVBs (p=0.79);<br>6% athletes versus 11% controls had frequent PVBs or complex VA (p=0.67) | N/A                                  |
| <b>Viitasalo, Eur Heart J suppl 1984<sup>2</sup></b> | 35/35                 | Teenager athletes (14-16 y.o.)           | 60% of athletes versus 57% of controls had at least 1 PVB (p=0.80)                                                                            | N/A                                  |
| <b>Talan, Chest 1982<sup>3</sup></b>                 | 20/50                 | Young (19-29 y.o.) long-distance runners | 70% of athletes versus 50% of controls had ≥1 PVB (p=0.13)<br>10% of athletes versus 6% of controls had >50 PVBs or complex VA (p=1.0)        | N/A                                  |
| <b>Pilcher, Am J cardiol 1983<sup>4</sup></b>        | 80/0                  | Young (mean 30 y.o.) runners             | 50% athletes at least 1 PVB, 7.5% >50/die, 4% repetitive                                                                                      | N/A                                  |
| <b>Palatini, Am Heart J 1985<sup>5</sup></b>         | 40/40                 | Young endurance (20±7 y.o.)              | 70% of athletes versus 55% of controls had ≥1 PVB (p=0.17)<br>13% athletes vs 0% controls had >30 PVBs or complex VA (p=0.12)                 | Echocardiography: negative in all    |
| <b>Bjornstad, Cardiology 1994<sup>6</sup></b>        | 60/30                 | Young                                    | No differences between cases and controls in rare PVBs. No complex forms.                                                                     | N/A                                  |

y.o.= year-old; PVB=premature ventricular beats; VA=ventricular arrhythmias. Complex VA are defined as couplets, triplets or NSVT

### Supplemental References:

1. Viitasalo MT, Kala R, Eisalo A. Ambulatory electrocardiographic recording in endurance athletes. *Br Heart J*. 1982;47:213-220.
2. Viitasalo MT, Kala R, Eisalo A. Ambulatory electrocardiographic findings in young athletes between 14 and 16 years of age. *Eur Heart J*. 1984;5:2-6.
3. Talan DA, Bauernfeind RA, Ashley WW, Kanakis C, Jr., Rosen KM. Twenty-four hour continuous ecg recordings in long-distance runners. *Chest*. 1982;82:19-24.
4. Pilcher GF, Cook AJ, Johnston BL, Fletcher GF. Twenty-four-hour continuous electrocardiography during exercise and free activity in 80 apparently healthy runners. *Am J Cardiol*. 1983;52:859-861.
5. Palatini P, Maraglino G, Sperti G, Calzavara A, Libardoni M, Pessina AC, Dal Palu C. Prevalence and possible mechanisms of ventricular arrhythmias in athletes. *Am Heart J*. 1985;110:560-567.
6. Bjornstad H, Storstein L, Meen HD, Hals O. Ambulatory electrocardiographic findings in top athletes, athletic students and control subjects. *Cardiology*. 1994;84:42-50.
